# Supplementary material for: Spatial Analysis of Agronomic Data and UAV Imagery for Rice Yield Estimation
Source: MDPI journal article supplement (doi:10.3390/agriculture11090809), 2021-08-26
Supplement: s1 [file s1]

### **Supplementary Material – Linear regression models**

*– Linear regression models for multitemporal vegetation indices (MRL) for Ronaldo variety and NDVI:*

$$YIELD_{AB} = -154.766 + 1281.315 NDVI_A - 9.675 NDVI_B$$

$$YIELD_{AC} = -413.551 + 1035.434 NDVI_A + 636.772 NDVI_C$$

$$YIELD_{BC} = -1374.901 + 752.870 NDVI_A + 2688.982 NDVI_C$$

$$YIELD_{ABC} = -1132.428 + 659.285 NDVI_A + 497.265 NDVI_B + 1755.871 NDVI_C$$

*– Linear regression models for multitemporal vegetation indices (MRL) for Ronaldo variety and RERDVI:*

$$YIELD_{AB} = 515.501 + 831.108 RERDVI_A + 73.461 RERDVI_B$$

$$YIELD_{AC} = 276.922 + 559.453 RERDVI_A + 1146.431 RERDVI_C$$

$$YIELD_{BC} = 384.696 + 90.827 RERDVI_B + 1616.244 RERDVI_C$$

$$YIELD_{ABC} = 268.285 + 566.385 RERDVI_A + 126.671 RERDVI_B + 1164.011 RERDVI_C$$

*– Linear regression models for multitemporal vegetation indices (MRL) for Gladio variety and NDVI:*

$$YIELD_{AB} = 762.228 - 842.783 NDVI_A + 1339.968 NDVI_B$$

$$YIELD_{AC} = 780.132 + 882.851 NDVI_A - 1430.237 NDVI_C$$

$$YIELD_{BC} = 780.259 + 864.281 NDVI_B - 892.572 NDVI_C$$

$$YIELD_{ABC} = 785.896 + 3007.831 NDVI_A - 2483.192 NDVI_B - 2346.801 NDVI_C$$

*– Linear regression models for multitemporal vegetation indices (MRL) for Gladio variety and MCARI1:*

$$YIELD_{AB} = 714.563 + 1.892 MCARI1_A + 917.864 MCARI1_B$$

$$YIELD_{AC} = 723.085 + 107.707 MCARI1_A - 488.462 MCARI1_C$$

$$YIELD_{BC} = 722.130 + 927.985 MCARI1_B - 36.495 MCARI1_C$$

$$YIELD_{ABC} = 732.430 + 383.327 MCARI1_A - 2503.616 MCARI1_B - 1653.287 MCARI1_C$$
